# Supplementary material for: Median bed-material sediment particle size across rivers in the contiguous U.S.
Source: Copernicus journal article supplement (doi:10.5194/essd-2021-201), 2021-07-08
Supplement: Supplementary file 1 [file essd-2021-201-supplement.pdf]

# Median bed-material sediment particle size across rivers in the contiguous U.S.

Guta Wakbulcho Abeshu<sup>1</sup>, Hong-Yi Li<sup>1\*</sup>, Zhenduo Zhu<sup>2\*</sup>, Zeli Tan<sup>3</sup>, L. Ruby Leung<sup>3</sup>

<sup>1</sup>Department of Civil & Environmental Engineering, University of Houston, Texas, 77204, USA

5 <sup>2</sup>Department of Civil, Structural and Environmental Engineering, University at Buffalo, the State University of New York, New York, 14260, USA

<sup>3</sup>Pacific Northwest National Laboratory, Washington, 99352, USA

*Correspondence to:* Hong-Yi Li (hongyili.jadison@gmail.com) and Zhenduo Zhu (zhenduo@buffalo.edu)

10

15

**Table S1 the 76 predictive variables**

| Group                 | Acronym       | Description                                                                                                                                                              |
|-----------------------|---------------|--------------------------------------------------------------------------------------------------------------------------------------------------------------------------|
| Soil                  |               |                                                                                                                                                                          |
| 1                     | TOT_SILTAVE   | Accumulated average percent of silt in soil based on total upstream routing                                                                                              |
| 2                     | TOT_CLAYAVE   | Accumulated average percent of clay in soil based on total upstream routing                                                                                              |
| 3                     | TOT_SANDAVE   | Average percent of sand in soil based on total upstream routing                                                                                                          |
| 4                     | TOT_KFACT     | Accumulated average value for all upstream catchments for KFactor based on total upstream routing                                                                        |
| 5                     | TOT_KFACT_UP  | Average value for KFactor in the upper soil horizon based on total upstream routing                                                                                      |
| 6                     | TOT_NO10AVE   | Accumulated average percent by weight of soil material less than 3 inches in size that passes through a No. 10 sieve (2 millimeters) based on total upstream routing     |
| 7                     | TOT_NO200AVE  | Accumulated average percent by weight of soil material less than 3 inches in size that passes through a No. 200 sieve (.074 millimeters) based on total upstream routing |
| 8                     | TOT_NO4AVE    | Average percent by weight of soil material less than 3 inches in size that passes through a No. 4 sieve (5 millimeters) based on total upstream routing                  |
| Lithology and Geology |               |                                                                                                                                                                          |
| 1                     | TOT_OLSON_K   | Estimated mean accumulated percentage of lithological potassium oxide (K <sub>2</sub> O) content in surface or near surface geology of all upstream NHDPlusV2 catchments |
| 2                     | TOT_OLSON_CAO | Estimated mean accumulated percentage of lithological calcium oxide (CaO) content in surface or near surface geology of all upstream NHDPlusV2 catchments                |

|    |                |                                                                                                                                                                                                                     |
|----|----------------|---------------------------------------------------------------------------------------------------------------------------------------------------------------------------------------------------------------------|
| 3  | TOT_OLSON_FE   | Estimated mean accumulated percentage of lithological ferric oxide (Fe <sub>2</sub> O <sub>3</sub> ) content in surface or near surface geology of all upstream NHDPlusV2 catchments                                |
| 4  | TOT_OLSON_MGO  | Estimated mean accumulated percentage of catchment that contains by the Olson geology of type rock type, Carbonate-rock aquifers.                                                                                   |
| 5  | TOT_OLSON_P    | Estimated mean accumulated percentage of catchment that contains lithological phosphorus pentoxide (P <sub>2</sub> O <sub>5</sub> ) content in surface or near surface geology of all upstream NHDPlusV2 catchments |
| 6  | TOT_OLSON_S    | Estimated mean accumulated percentage of lithological sulfur (S) content in surface or near surface geology of all upstream NHDPlusV2 catchments                                                                    |
| 7  | TOT_OLSON_SI   | Estimated mean accumulated percentage of lithological silicon dioxide (SiO <sub>2</sub> ) content in surface or near surface geology of all upstream NHDPlusV2 catchments                                           |
| 8  | TOT_OLSON_UCS  | Estimated mean accumulated lithological compressive strength, measured as uniaxial compressive strength (in megaPascals, MPa) of surface or near surface geology of all upstream NHDPlusV2 catchments               |
| 9  | TOT_OLSON_PERM | Estimated mean accumulated percentage of lithological hydraulic conductivity (in micrometers per second) of surface or near surface geology of all upstream NHDPlusV2 catchments                                    |
| 10 | CARB           | Estimated percent of the catchment covered by Carbonate rocks such as limestone and dolostone                                                                                                                       |
| 11 | CLAST_C        | Estimated percent of the catchment covered by Clastic sediments/rocks primarily made of sands, gravels, cobbles, or larger clasts.                                                                                  |
| 12 | CLAST_F        | Estimated percent of the catchment covered by Clastic sediments/rocks primarily made of fine-grained materials such as shale, siltstone, claystone, mudstone.                                                       |

|            |                    |                                                                                                                                                                                           |
|------------|--------------------|-------------------------------------------------------------------------------------------------------------------------------------------------------------------------------------------|
| 13         | CLAST_U            | Estimated percent of the catchment covered by Clastic sediments/rocks of unknown or highly variable clast sizes                                                                           |
| 14         | EVAP               | Estimated percent of the catchment covered by Evaporites or playas.                                                                                                                       |
| 15         | META               | Estimated percent of the catchment covered by Metamorphic rocks.                                                                                                                          |
| 16         | PLUT_OTH           | Estimated percent of the catchment covered by Igneous, generally mafic, other less quartz-rich plutonic rocks, such as monzonite or gabbro.                                               |
| 17         | PLUT_QTZ           | Estimated percent of the catchment covered by Igneous, generally felsic, quartz-rich plutonic rocks such as granitoids, granite, granodacite.                                             |
| 18         | VOLC_OTH           | Estimated percent of the catchment covered by Igneous, generally mafic, volcanic rocks, such as basalt that are mineralogically equivalent to the less quartz-rich plutonic rocks         |
| 19         | VOLC_QTZ           | Estimated percent of the catchment covered by Igneous, generally felsic, volcanic rocks such as rhyolite and dacite that are mineralogically equivalent to the quartz-rich plutonic rocks |
| 20         | WATER              | Estimated percent of the catchment covered by Water or ice.                                                                                                                               |
| Topography |                    |                                                                                                                                                                                           |
| 1          | BANKFULL_WIDTH     | Estimated bankfull width of flowline reach calculated using Bieger 's regression equation (Bieger et al, 2015)                                                                            |
| 2          | BANKFULL_DEPTH     | Estimated bankfull depth of flowline reach calculated using Bieger 's regression equation (Bieger et al, 2015)                                                                            |
| 3          | BANKFULL_XSEC_AREA | Estimated bankfull cross sectional area of flowline reach calculated using Bieger 's regression equation (Bieger et al, 2015)                                                             |
| 4          | sinuosity          | Flowline reach sinuosity at the flowline reach scale only                                                                                                                                 |
| 5          | TOT_BASIN_SLOPE    | Average slope in percent of all upstream flowline catchments                                                                                                                              |
| 6          | TOT_ELEV_MEAN      | Mean elevation in meters of all upstream flowline catchments                                                                                                                              |
| 7          | TOT_STREAM_SLOPE   | Average slope in percent flowlines                                                                                                                                                        |
| 8          | TOT_STREAM_LENGTH  | Total length of all upstream flowlines in kilometers                                                                                                                                      |

|           |                 |                                                                                                                                                                                                                                             |
|-----------|-----------------|---------------------------------------------------------------------------------------------------------------------------------------------------------------------------------------------------------------------------------------------|
| Climate   |                 |                                                                                                                                                                                                                                             |
| 1         | TOT_RF7100      | Accumulated estimated watershed mean annual average for the Rainfall and Runoff factor ("R factor" of Universal Soil Loss Equation) for the period 1971-2000 in hundreds of foot-ton force-inch/acre-hour per year for the period 1971-2000 |
| 2         | TOT_WDANN       | Accumulated value for all upstream catchments for the annual 30 year average (1961-1990) number of days of measurable precipitation                                                                                                         |
| 3         | TOT_PRSNOW      | Accumulated estimated mean annual snow as a percent of total precipitation, 1905-2002                                                                                                                                                       |
| 4         | AI              | Aridity Index                                                                                                                                                                                                                               |
| 5         | TOT_Temperature | Accumulated annual value of temperature                                                                                                                                                                                                     |
| 6         | TOT_RFACT       |                                                                                                                                                                                                                                             |
| NHDplus   |                 |                                                                                                                                                                                                                                             |
| 1         | lengthkm        | Flowline length in kilometers                                                                                                                                                                                                               |
| 2         | streamorde      | stream order                                                                                                                                                                                                                                |
| 3         | totdasqkm       | Drainage area in square kilometers                                                                                                                                                                                                          |
| 4         | maxelevsmo      | maximum elevation of flowline                                                                                                                                                                                                               |
| 5         | minelevsmo      | minmum elevation of flowline                                                                                                                                                                                                                |
| 6         | slope           | Flowline slope                                                                                                                                                                                                                              |
| 7         | ve_ma           | flow velocity                                                                                                                                                                                                                               |
| 8         | pathlength      | Flowline distance from the basin outlet( termnial outlet)                                                                                                                                                                                   |
| Hydrology |                 |                                                                                                                                                                                                                                             |
| 1         | TOT_RUN7100     | Accumulated estimated 30-year (1971-2000) average annual runoff, mm/year based on total upstream accumulation                                                                                                                               |
| 2         | TOT_STRM_DENS   | Density of streams defined as stream length (meters) divided by catchment(s) area (square meters).                                                                                                                                          |
| 3         | TOT_HLR_1       | Accumulated estimated percent of catchment that contains subhumid plains with permeable soils and bedrock                                                                                                                                   |
| 4         | TOT_HLR_2       | Accumulated estimated percent of catchment that contains humid plains with permeable soils and bedrock                                                                                                                                      |

|    |            |                                                                                                                           |
|----|------------|---------------------------------------------------------------------------------------------------------------------------|
| 5  | TOT_HLR_3  | Accumulated estimated percent of catchment that contains subhumid plains with impermeable soils and permeable bedrock     |
| 6  | TOT_HLR_4  | Accumulated estimated percent of catchment that contains humid plains with permeable soils and bedrock                    |
| 7  | TOT_HLR_5  | Accumulated estimated percent of catchment that contains arid plains with permeable soils and bedrock                     |
| 8  | TOT_HLR_6  | Accumulated estimated percent of catchment that contains subhumid plains with impermeable soils and bedrock               |
| 9  | TOT_HLR_7  | Accumulated estimated percent of catchment that contains humid plains with permeable soils and impermeable bedrock        |
| 10 | TOT_HLR_8  | Accumulated estimated percent of catchment that contains semi arid plains with impermeable soils and bedrock              |
| 11 | TOT_HLR_9  | Accumulated estimated percent of catchment that contains humid plateaus with impermeable soils and permeable bedrock      |
| 12 | TOT_HLR_10 | Accumulated estimated percent of catchment that contains arid plateaus with impermeable soils and permeable bedrock       |
| 13 | TOT_HLR_11 | Accumulated estimated percent of catchment that contains humid plateaus with impermeable soils and bedrock                |
| 14 | TOT_HLR_12 | Accumulated estimated percent of catchment that contains semi arid plateaus with permeable soils and impermeable bedrock  |
| 15 | TOT_HLR_13 | Accumulated estimated percent of catchment that contains semi arid plateaus with impermeable soils and bedrock            |
| 16 | TOT_HLR_14 | Accumulated estimated percent of catchment that contains arid playas with permeable soils and bedrock                     |
| 17 | TOT_HLR_15 | Accumulated estimated percent of catchment that contains semi arid mountains with impermeable soils and permeable bedrock |
| 18 | TOT_HLR_16 | Accumulated estimated percent of catchment that contains humid mountains with permeable soils and impermeable bedrock     |
| 19 | TOT_HLR_17 | Accumulated estimated percent of catchment that contains semi arid mountains with impermeable soils and bedrock           |

|    |             |                                                                                                                                                          |
|----|-------------|----------------------------------------------------------------------------------------------------------------------------------------------------------|
| 20 | TOT_HLR_18  | Accumulated estimated percent of catchment that contains semi arid mountains with permeable soils and impermeable bedrock                                |
| 21 | TOT_HLR_19  | Accumulated estimated percent of catchment that contains very humid mountains with permeable soils and impermeable bedrock                               |
| 22 | TOT_HLR_20  | Accumulated estimated percent of catchment that contains humid mountains with permeable soils and impermeable bedrock                                    |
| 23 | TOT_SATOF   | Accumulated mean saturation overland flow as a percent of streamflow based on total upstream accumulation                                                |
| 24 | TOT_IEOF    | Accumulated mean infiltration-excess overland flow as a percent of streamflow based on total upstream accumulation                                       |
| 25 | TOT_TWI     | Accumulated average topographic wetness index based on total upstream accumulation                                                                       |
| 26 | TOT_CONTACT | Accumulated contact time, the length of time it takes for water to drain along subsurface flow paths to the stream, based on total upstream accumulation |

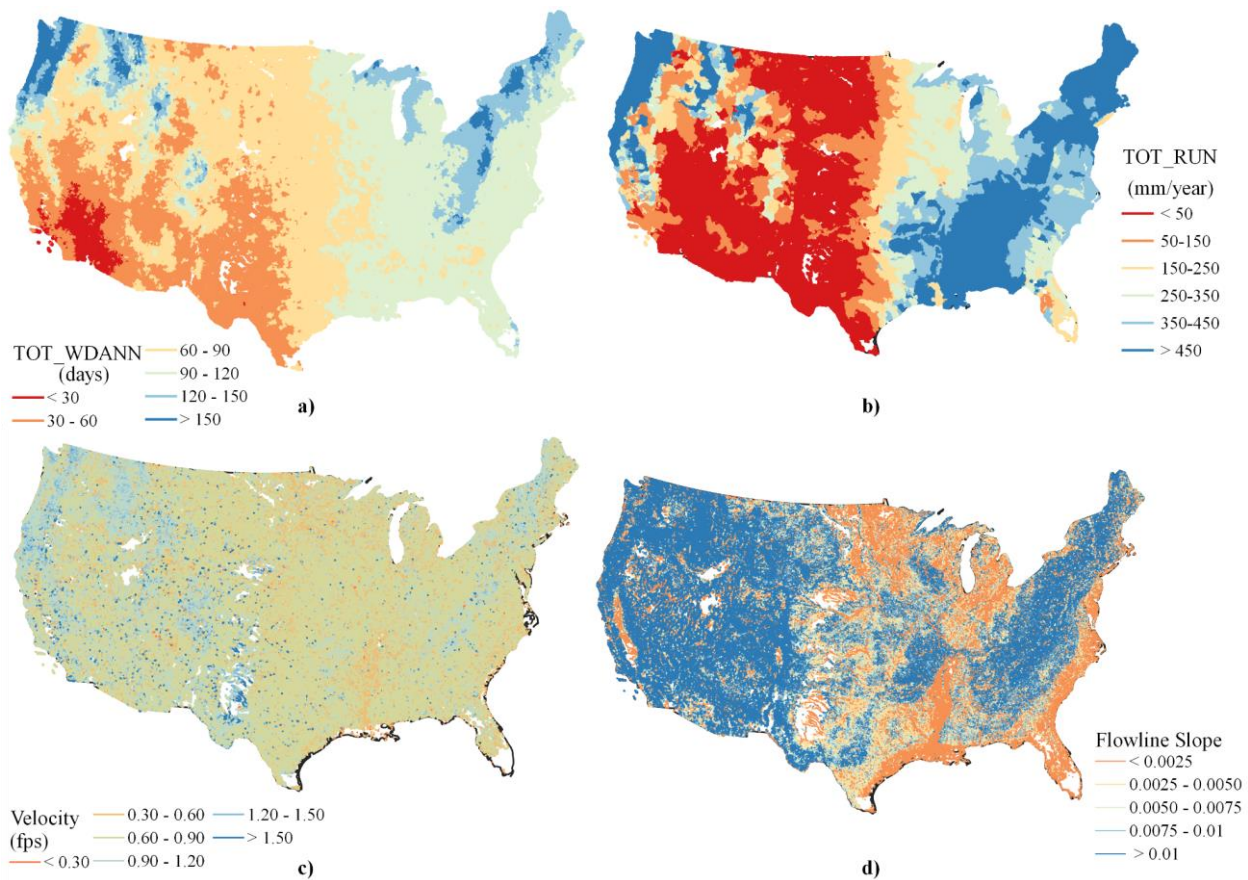

Figure S1. Spatial maps of predictive variables from NHDplus. a. Annual average number of wet days (TOT\_WDANN); b. Mean annual runoff (TOT\_RUN); c. Mean annual flow velocity (Velocity); d. Channel slope in the upstream drainage area (Flowline Slope).

30

35



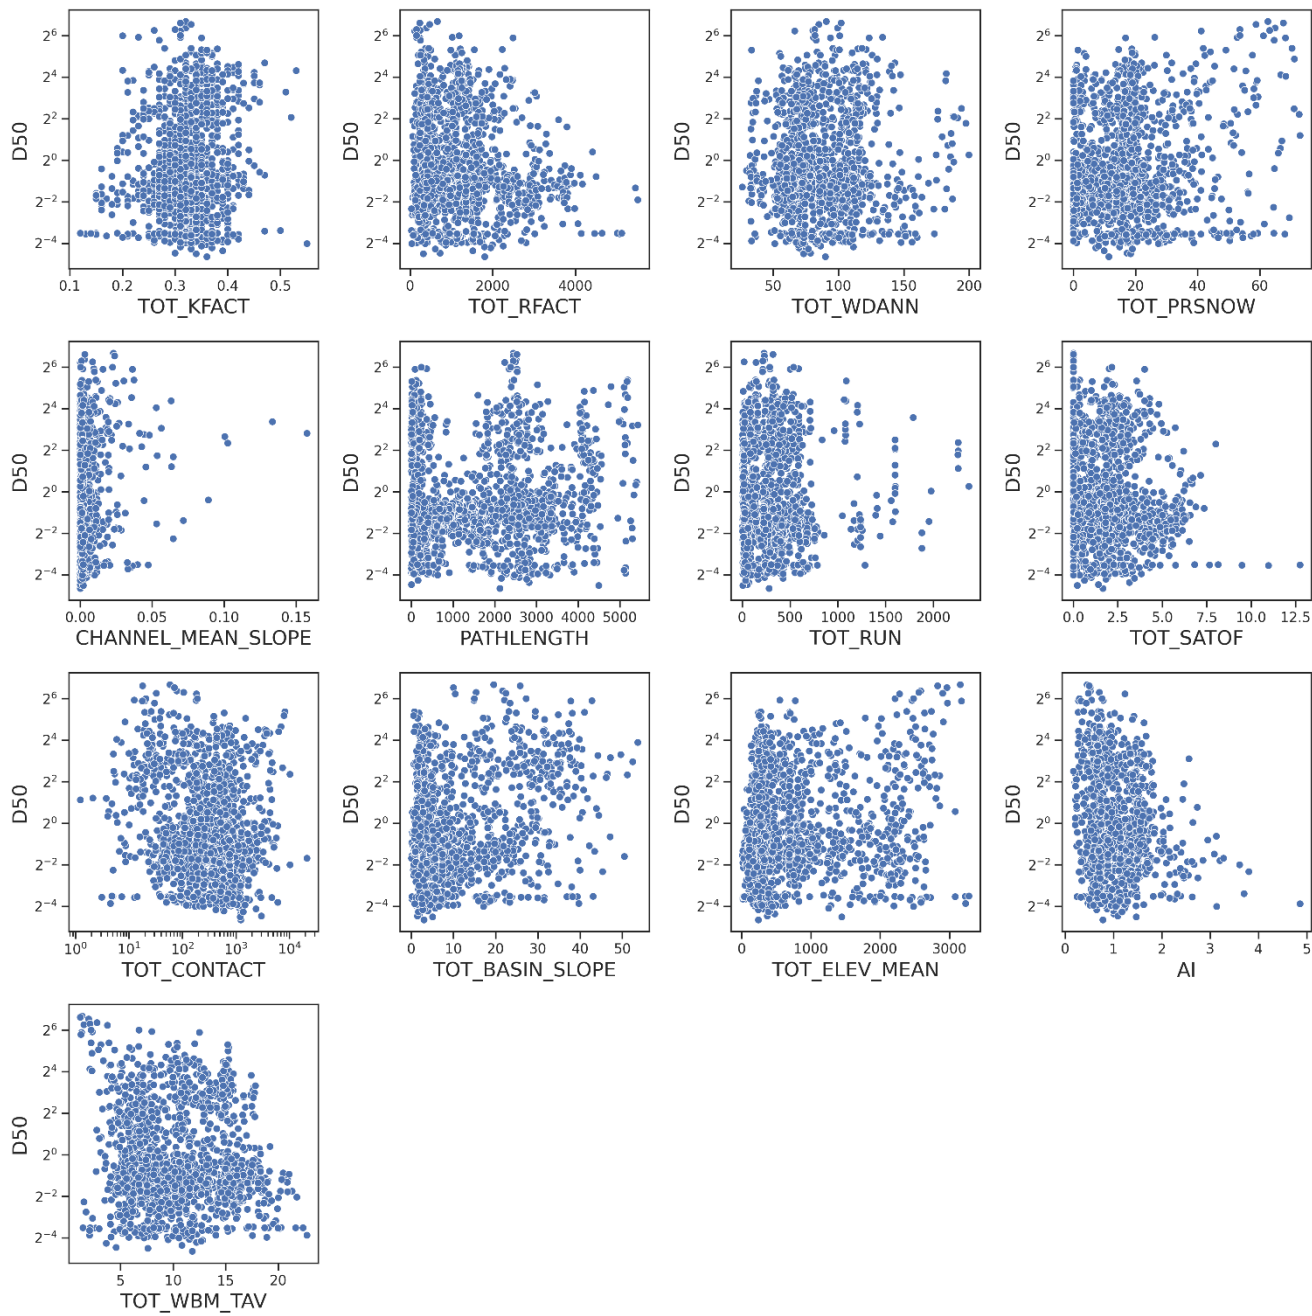

Figure S2. Scatter plots between D50 and the selected important features.
